# Supplementary material for: An ionic covalent organic framework for rapid extraction of polar organic acids from environmental waters
Source: Royal Society of Chemistry journal article supplement (doi:10.1039/d1ay00679g), 2021-01-01
Supplement: d1ay00679g1.pdf [file d1ay00679g1.pdf]

## Electronic Supporting Material

### **Ionic covalent organic framework for rapid extraction of polar organic acids in environmental waters**

Jing Sun<sup>a</sup>, Fang Xue<sup>a</sup>, Cui-Ling Gao<sup>b\*</sup>, Lei Li<sup>a</sup>, Hai-Long Jiang<sup>a\*</sup>, Ru-Song Zhao<sup>a</sup>, Jin-Ming Lin<sup>c</sup>

<sup>a</sup> Qilu University of Technology (Shandong Academy of Science), Shandong Analysis and Test Center, School of Environmental Science and Engineering, Jinan, 250014, P.R. China

<sup>b</sup> Shandong Institute for Product Quality Inspection, Jinan, 250014, P. R. China

<sup>c</sup> Department of Chemistry, Tsinghua University, Beijing, 100084, P. R. China

---

\* Corresponding author. Phone: + 86-531-82605343; E-mail: [j05hx121@126.com](mailto:j05hx121@126.com).

## Contents

1. **Figure S1.** Synthesis diagram of  $\text{Fe}_3\text{O}_4@\text{EB-TFB-iCOF}$
2. **Figure S2.** Zeta potential analysis of  $\text{Fe}_3\text{O}_4@\text{EB-TFB-iCOF}$
3. **Table S1.** Reproducibility of  $\text{Fe}_3\text{O}_4@\text{EB-TFB-iCOF}$
4. **Table S2.** Extraction selectivity of  $\text{Fe}_3\text{O}_4@\text{EB-TFB-iCOF}$
5. **Table S3.** Physical–chemical properties of organic acids

**Figure S1** Synthesis diagram of  $\text{Fe}_3\text{O}_4@\text{EB-TFB-iCOF}$

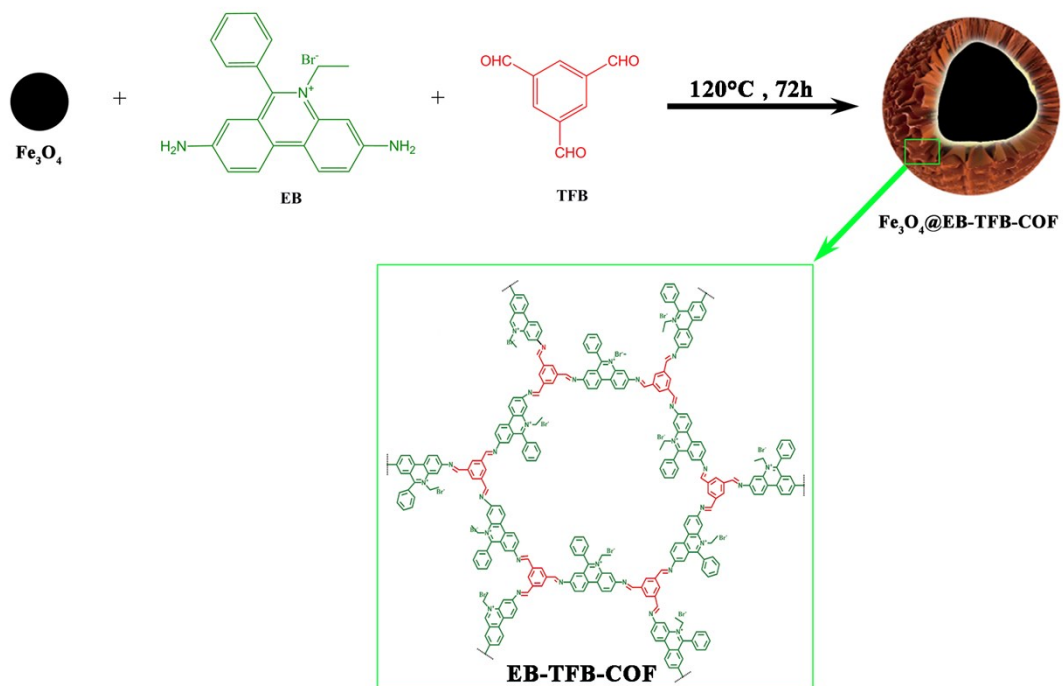

**Figure S2** Zeta potential analysis of  $\text{Fe}_3\text{O}_4@\text{EB-TFB-iCOF}$

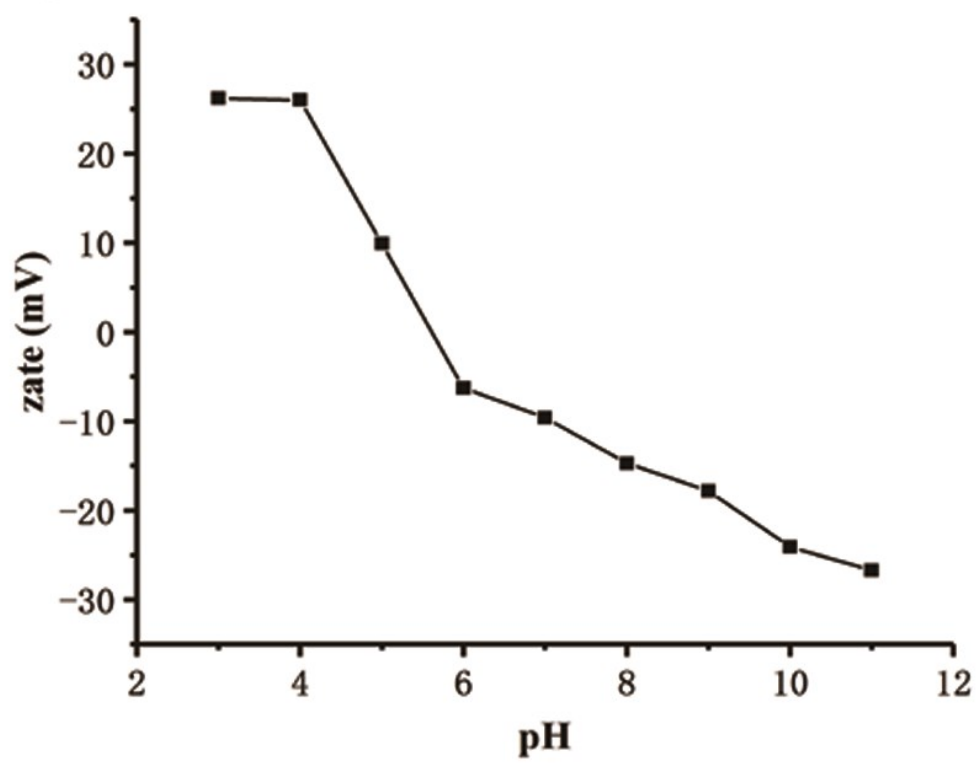

**Table S1** Reproducibility of Fe<sub>3</sub>O<sub>4</sub>@EB-TFB-iCOF

## a. Three parallel extraction materials

| Analytes | Parallel 1, R (%) | Parallel 2, R (%) | Parallel 3, R (%) | RSD (%) |
|----------|-------------------|-------------------|-------------------|---------|
| NAA      | 80.4%             | 89.8%             | 80.3%             | 5.34    |
| BNOA     | 99.0%             | 90.2%             | 98.9%             | 4.29    |
| MCPA     | 90.4%             | 94.4%             | 94.6%             | 2.54    |
| 2,4,5-TP | 94.0%             | 88.7%             | 95.5%             | 3.15    |

## b. Single extraction material with five replicates

| Analytes | n=1,<br>R (%) | n=2,<br>R (%) | n=3,<br>R (%) | n=4,<br>R (%) | n=5,<br>R (%) | RSD (%) |
|----------|---------------|---------------|---------------|---------------|---------------|---------|
| NAA      | 97.6%         | 93.9%         | 90.1%         | 91.7%         | 90.0%         | 2.80    |
| BNOA     | 89.7%         | 94.8%         | 98.3%         | 96.3%         | 99.5%         | 3.26    |
| MCPA     | 97.4%         | 87.8%         | 90.4%         | 85.2%         | 91.3%         | 4.13    |
| 2,4,5-TP | 92.0%         | 87.6%         | 87.6%         | 88.7%         | 88.3%         | 1.68    |

**Table S2** Extraction efficiency of different pollutants using Fe<sub>3</sub>O<sub>4</sub>@EB-TFB-iCOF as MSPE adsorbent (n=3)

| Analytes                   | EE (%)     | RSD (%) |
|----------------------------|------------|---------|
| Organic acids <sup>a</sup> | 72.1-93.3% | 0.4-1.3 |
| Sulfonamides <sup>b</sup>  | 30.6-39.2% | 0.8-1.7 |
| Estrogens <sup>c</sup>     | 34.2-41.2% | 1.1-1.9 |
| PAHs <sup>d</sup>          | 6.4-9.6%   | 0.7-2.4 |

<sup>a</sup> NAA, BNOA, MCPA, 2,4,5-TP; <sup>b</sup> Sulfadiazine, sulfapyridine, sulfamerazine, sulfamethoxazole, sulfisoxazole; <sup>c</sup> Estriol,  $\beta$ -Estradiol; <sup>d</sup> Naphthalene, Acenaphthene, Phenanthrene, Fluoranthene

**Table S3** Physical–chemical properties of organic acids

| Analytes | Structure                                                                          | Molecular weight | $pK_a$ |
|----------|------------------------------------------------------------------------------------|------------------|--------|
| NAA      | 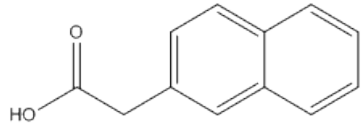  | 186.2            | 3.73   |
| BNOA     |   | 202.2            | 4.60   |
| MCPA     |   | 200.6            | 3.14   |
| 2,4,5-TP |  | 269.5            | 3.03   |
